# Supplementary material for: Cognitive Profiles of Partial PTSD in Vietnam War Veterans
Source: Preprints.org preprint supplement (doi:10.20944/preprints202402.1447.v1), 2024-02-26
Supplement: Supplementary file 1 [file supplementary]

**Supplementary Table S1.** Concomitant psychotropic medication

| **Concomitant psychotropic medication** | **Non-PTSD** | **Partial PTSD** | ***p*** |
| --- | --- | --- | --- |
| **(N = 36)** | **(N = 10)** |  |
| Antidepressant | 31 (86.11%) | 9 (90.00%) | 1.000 |
| Benzodiazepines | 15 (41.67%) | 5 (50.00%) | 0.726 |
| Buspirone | 8 (22.22%) | 3 (30.00%) | 0.682 |
| Mood stabilizer | 1 (2.78%) | 1 (10.00%) | 0.391 |
| Antipsychotics | 7 (19.44%) | 1 (10.00%) | 0.664 |
| Z-drugs | 2 (5.56%) | 1 (10.00%) | 0.530 |
| Alpha-1 blocker | 0 (0.00%) | 1 (10.00%) | 0.217 |
| Beta blocker | 0 (0.00%) | 1 (10.00%) | 0.217 |
| Other nootropics | 3 (8.33%) | 0 (0.00%) | 1.000 |
